# Supplementary material
Source: Springer Nature journal article supplement (https://www.springermedizin.de/resource/supplementary/12891_2012_1749_MOESM7_ESM.pdf/9508478)

SFFhy Physical SF6D Loen = -3,288 Spread = 2,187 FitRes = 1,261 ChiSq[Pt] = 0,151 SampleN = 133

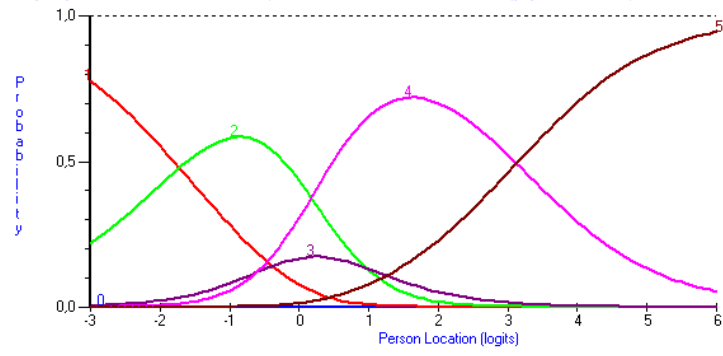

Supplement: MOESM7 [file 9508478]
